# Supplementary material for: Single-Cell RNA-Sequencing Portraying Functional Diversity and Clinical Implications of IFI6 in Ovarian Cancer
Source: PubMed Central journal article supplement (PMC8425592; doi:10.3389/fcell.2021.677697), 2021-08-25
Supplement: Presentation_1.pdf [file Presentation_1.pdf]

# Single-cell RNA-sequencing portraying functional diversity and clinical implications of IFI6 in ovarian cancer

Hongyu Zhao<sup>1</sup>, Zhefeng Li<sup>1</sup>, Yan Gao<sup>1</sup>, Jie Li<sup>1</sup>, Xiaoting Zhao<sup>1#</sup>, Wentao Yue<sup>1#</sup>

1 Central Laboratory, Beijing Obstetrics and Gynecology Hospital Capital Medical University, Capital Medical University, Beijing 100026, China

# Corresponding authors.

E-mail: yuewt@ccmu.edu.cn (WTY), zhao\_xiaoting@126.com (XTZ)

**Fig. S1 tSNE plots color-coded for annotated OCs by unaligned (A) and aligned (B) clustering.**

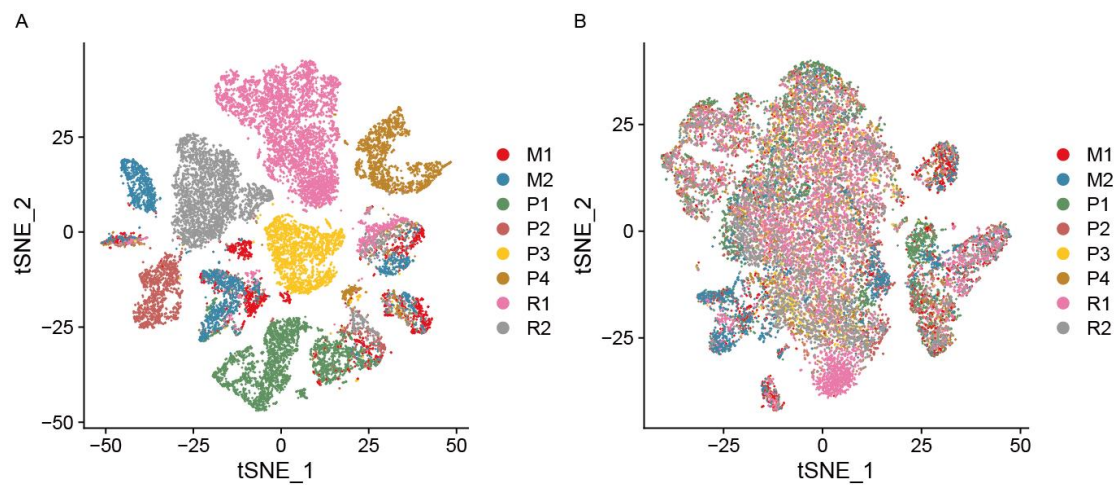

**Fig. S2 Landscape of 18 gene interactions in the TCGA OC cohort.**

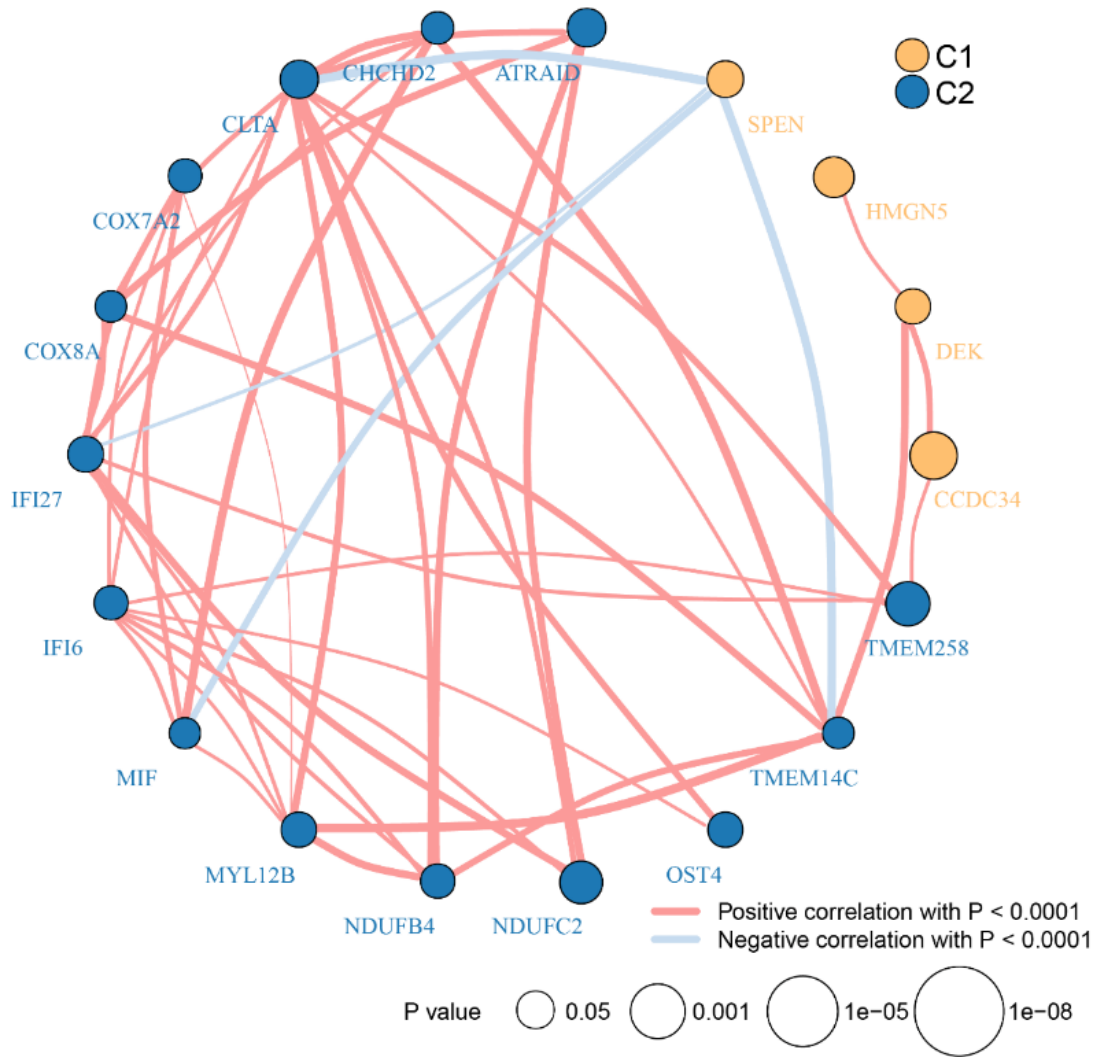

**Fig. S3 Identification two clinical treatment subtype with GDSC dataset**

(A) Consensus matrixes of GDSC for  $k = 2-6$ . (B) Heatmap of 18 gene in GDSC dataset. (C) Boxplot of IC50 for cisplatin and docetaxel between C1 and C2.

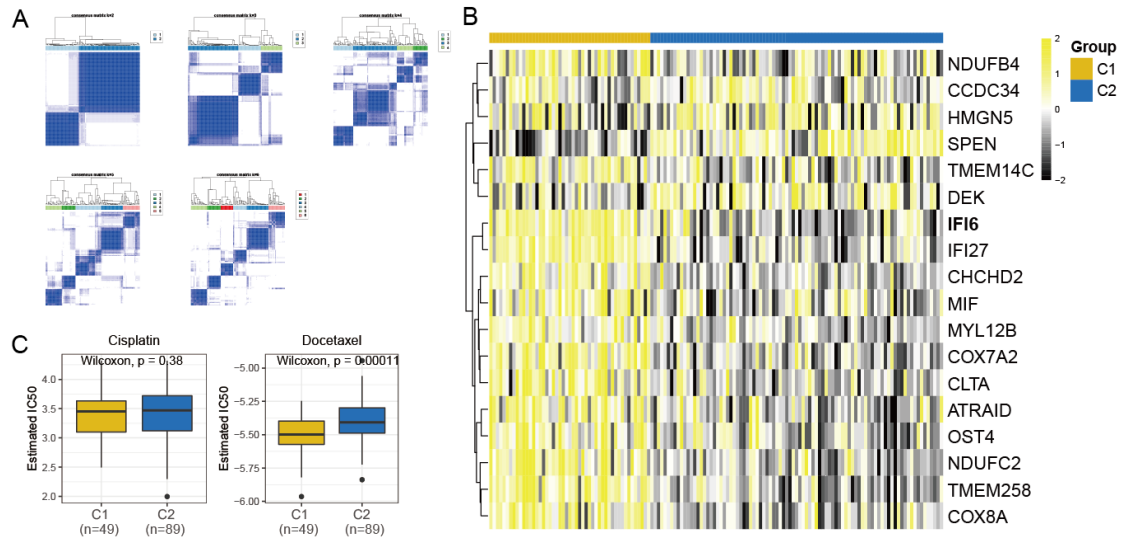

## Fig. S4 Functional analysis of differential expression genes (DEGs) between C2 and C2.

(A)Volcano plot of DEGs between C2 and C1. GO (B) and KEGG (C) of C1. GO (D) and KEGG (E) of C2.

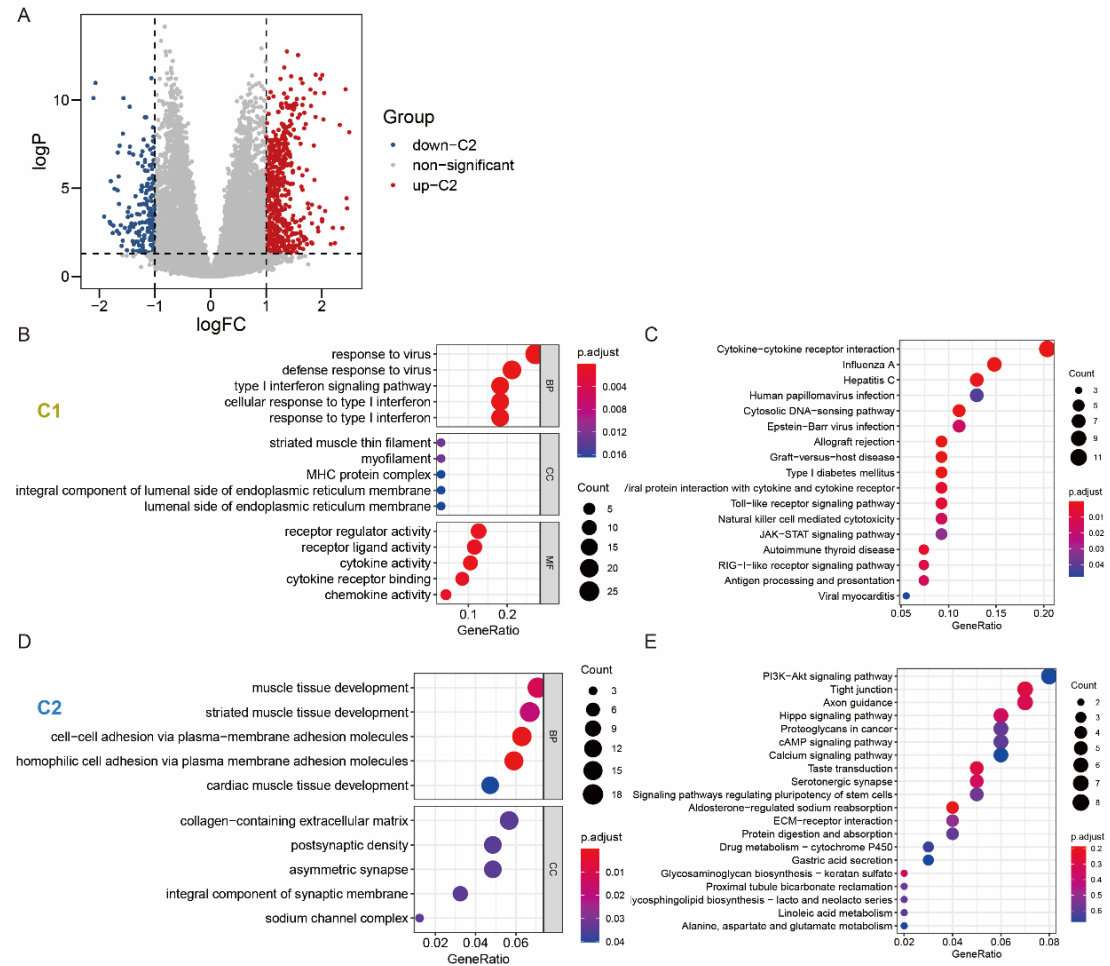

**Fig. S5 Violin plots exhibiting the expression of representative markers across diverse cell types. The y axis was the normalized read count.**

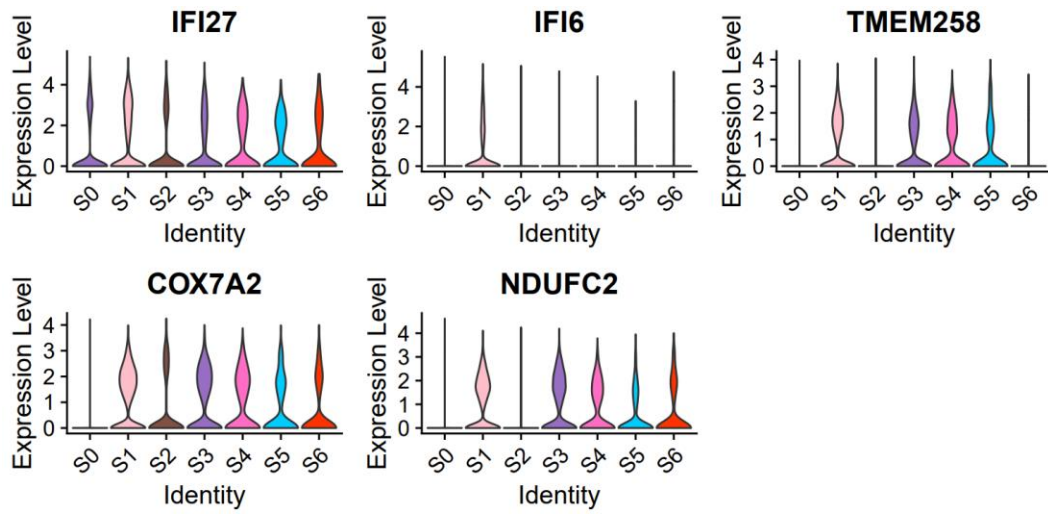

**Fig. S6 Forest plot illustrating the survival associated with IFI6 in different datasets of OC patients.**

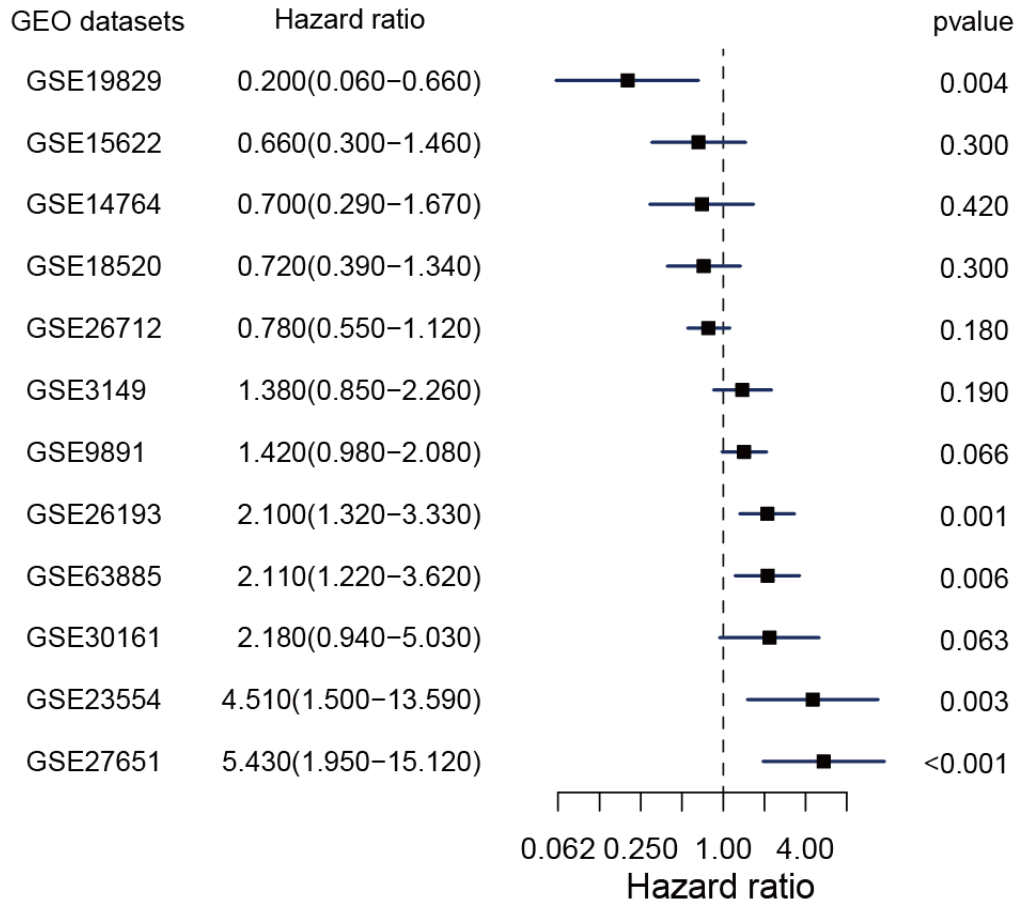

**Fig. S7 Correlation of IFI6 and markers of NF- $\kappa$ B pathway based on TCGA, every dot represents one cancer type.**

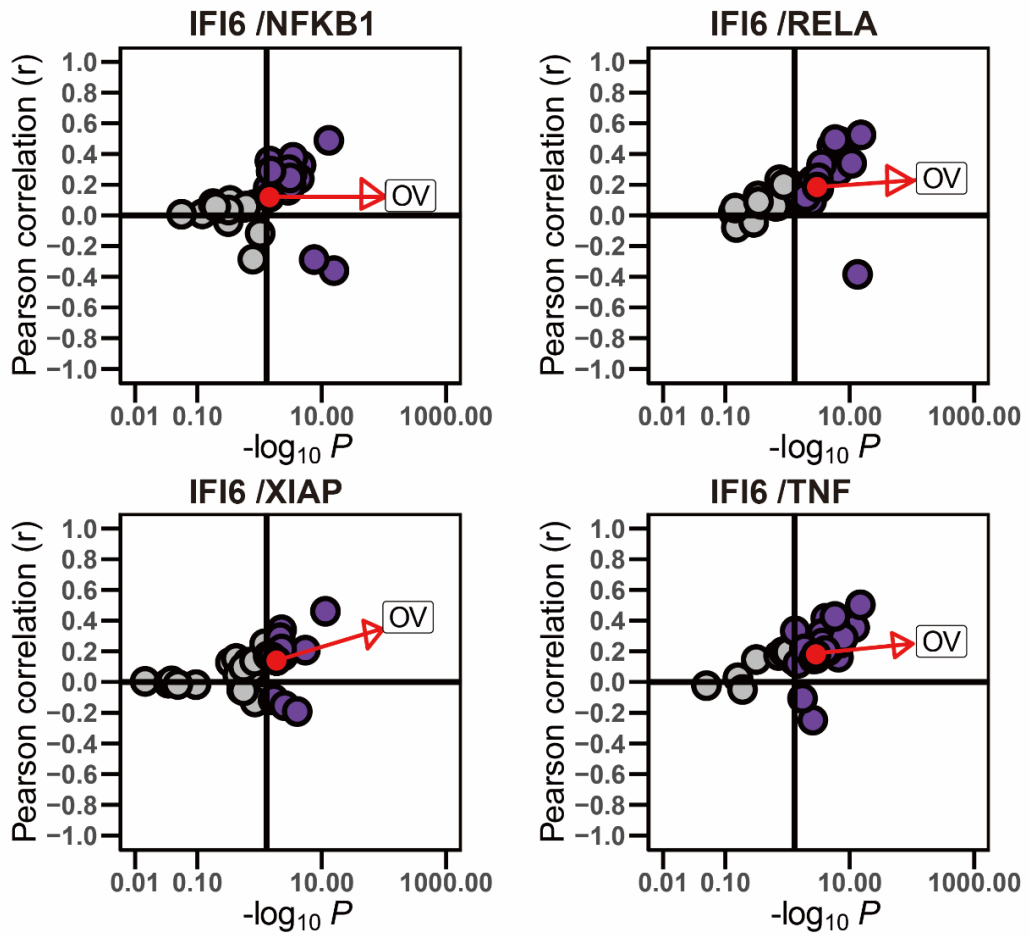

**Fig. S8 Calibration plots for Riskscore based on TCGA OC dataset and GEO OC meta\_dataset.**

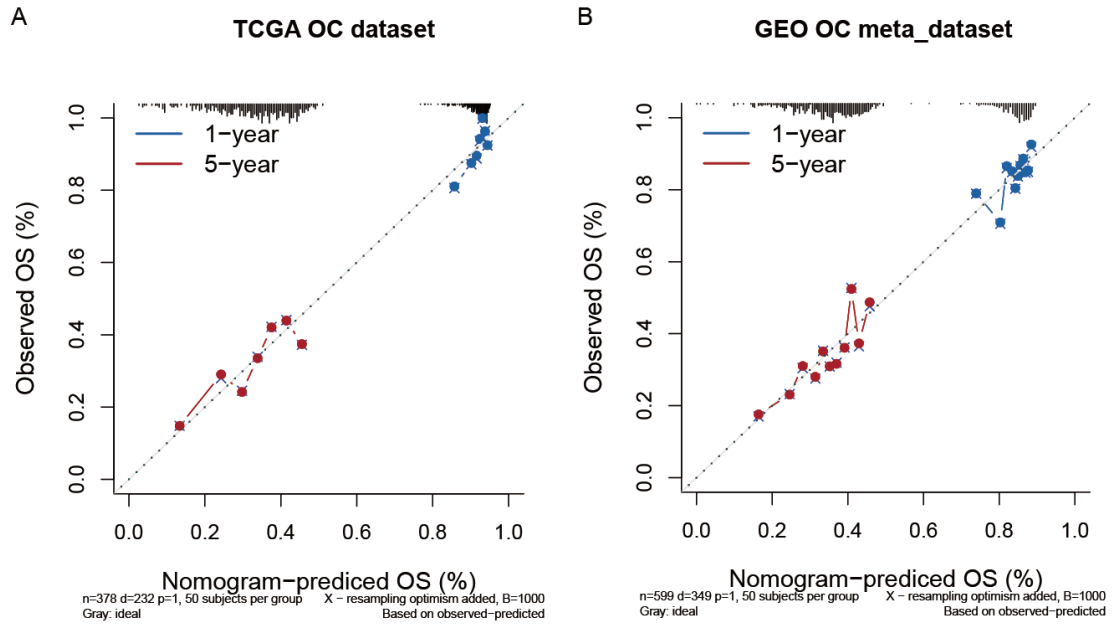



**Table S1. All the datasets used in the manuscript.****A. The Cancer Genome Atlas (TCGA) datasets download from UCSC Xena.**

| Cancer                                  | Samples |
|-----------------------------------------|---------|
| Acute Myeloid Leukemia (LAML)           | 151     |
| Adrenocortical Cancer (ACC)             | 79      |
| Bile Duct Cancer (CHOL)                 | 45      |
| Bladder Cancer (BLCA)                   | 430     |
| Breast Cancer (BRCA)                    | 1217    |
| Cervical Cancer (CESC)                  | 309     |
| Colon Cancer (COAD)                     | 512     |
| Endometrioid Cancer (UCEC)              | 583     |
| Esophageal Cancer (ESCA)                | 173     |
| Glioblastoma (GBM)                      | 173     |
| Head and Neck Cancer (HNSC)             | 546     |
| Kidney Chromophobe (KICH)               | 89      |
| Kidney Clear Cell Carcinoma (KIRC)      | 607     |
| Kidney Papillary Cell Carcinoma (KIRP)  | 321     |
| Large B-cell Lymphoma (DLBC)            | 48      |
| Liver Cancer (LIHC)                     | 424     |
| Lower Grade Glioma (LGG)                | 529     |
| Lung Adenocarcinoma (LUAD)              | 585     |
| Lung Squamous Cell Carcinoma (LUSC)     | 550     |
| Melanoma (SKCM)                         | 472     |
| Mesothelioma (MESO)                     | 86      |
| Ocular melanomas (UVM)                  | 80      |
| Ovarian Cancer (OV)                     | 379     |
| Pancreatic Cancer (PAAD)                | 182     |
| Pheochromocytoma & Paraganglioma (PCPG) | 186     |
| Prostate Cancer (PRAD)                  | 551     |
| Rectal Cancer (READ)                    | 177     |
| Sarcoma (SARC)                          | 265     |
| Stomach Cancer (STAD)                   | 407     |
| Testicular Cancer (TGCT)                | 156     |
| Thymoma (THYM)                          | 121     |
| Thyroid Cancer (THCA)                   | 568     |
| Uterine Carcinosarcoma (UCS)            | 56      |
| Pan-Cancer (PANCAN)                     | 10535   |
| GTEX                                    | 9783    |

**B. The Gene Expression Omnibus (GEO) OC datasets**

| GSE ID   | Platform                             | Samples |
|----------|--------------------------------------|---------|
| GSE18520 | Affymetrix HG-U133 Plus 2.0 (GPL570) | 63      |
| GSE26193 | Affymetrix HG-U133 Plus 2.0 (GPL570) | 107     |

|           |                                              |     |
|-----------|----------------------------------------------|-----|
| GSE30161  | Affymetrix HG-U133 Plus 2.0 (GPL570)         | 58  |
| GSE63885  | Affymetrix HG-U133 Plus 2.0 (GPL570)         | 75  |
| GSE9891   | Affymetrix HG-U133 Plus 2.0 (GPL570)         | 278 |
| GSE54388  | Affymetrix HG-U133 Plus 2.0 (GPL570)         | 22  |
| GSE130000 | Illumina NextSeq 500                         | 8   |
| GSE45553  | Affymetrix Human Gene 1.0 ST Array (GPL6244) | 8   |
| GSE47856  | Affymetrix Human Gene 1.0 ST Array (GPL6244) | 171 |

**Table S2. 18 genes with statistical significance using the univariable Cox proportional hazards regression based on TCGA OC dataset.**

| ID      | HR    | 95% CI_low | 95% CI_up | P_Value |
|---------|-------|------------|-----------|---------|
| ATRAID  | 0.751 | 0.599      | 0.941     | 0.013   |
| CCDC34  | 0.724 | 0.589      | 0.889     | 0.00201 |
| CHCHD2  | 0.8   | 0.651      | 0.985     | 0.03532 |
| CLTA    | 0.731 | 0.571      | 0.937     | 0.01331 |
| COX7A2  | 0.835 | 0.71       | 0.983     | 0.03026 |
| COX8A   | 0.833 | 0.698      | 0.993     | 0.0419  |
| DEK     | 0.801 | 0.663      | 0.968     | 0.02179 |
| HMG5    | 0.788 | 0.664      | 0.936     | 0.00663 |
| IFI27   | 0.924 | 0.865      | 0.988     | 0.0207  |
| IFI6    | 0.923 | 0.858      | 0.992     | 0.02848 |
| MIF     | 0.89  | 0.794      | 0.998     | 0.04568 |
| MYL12B  | 0.782 | 0.633      | 0.965     | 0.02198 |
| NDUFB4  | 0.805 | 0.665      | 0.975     | 0.02684 |
| NDUFC2  | 0.786 | 0.666      | 0.928     | 0.00458 |
| OST4    | 0.804 | 0.666      | 0.971     | 0.02361 |
| SPEN    | 1.303 | 1.046      | 1.622     | 0.01813 |
| TMEM14C | 0.808 | 0.657      | 0.994     | 0.04369 |
| TMEM258 | 0.741 | 0.605      | 0.906     | 0.00358 |

**Table S3. Gene primer sequence**

| Gene symbol | Primer sequence (5'--3') |
|-------------|--------------------------|
| IFI6-F      | GGTCTGCGATCCTGAATGGG     |
| IFI6-R      | TCACTATCGAGATACTTGTGGGT  |
| NFKB1-F     | AACAGAGAGGATTTTCGTTCCG   |
| NFKB1-R     | TTTGACCTGAGGGTAAGACTTCT  |
| XIAP-F      | ACCGTGCGGTGCTTTAGTT      |
| XIAP-R      | TGCGTGCACTATTTCAAGATA    |
| RELA-F      | ATGTGGAGATCATTGAGCAGC    |
| RELA-R      | CCTGGTCCTGTGTAGCCATT     |
| TNF-F       | CCTCTCTAATCAGCCCTCTG     |

---

---

TNF-R

GAGGACCTGGGAGTAGATGAG

---

---

**Table S4. Cell number of assigned celltypes across each sample is summarized.**

|    | C0   | C1  | C2  | C3  | C4  | C5 | Total |
|----|------|-----|-----|-----|-----|----|-------|
| P1 | 1591 | 956 | 458 | 193 | 37  | 7  | 3242  |
| P2 | 986  | 323 | 177 | 20  | 33  | 32 | 1571  |
| P3 | 1952 | 77  | 108 | 15  | 19  | 15 | 2186  |
| P4 | 1431 | 202 | 250 | 5   | 135 | 62 | 2085  |
| M1 | 440  | 362 | 112 | 221 | 256 | 98 | 1489  |
| M2 | 993  | 315 | 33  | 511 | 123 | 51 | 2026  |
| R1 | 3953 | 479 | 591 | 80  | 36  | 52 | 5191  |
| R2 | 2728 | 279 | 343 | 18  | 46  | 8  | 3422  |
